# Supplementary material
Source: PubMed Central journal article supplement (PMC10658812)
Supplement: NIHMS1810610-supplement-Supplement.pdf [file NIHMS1810610-supplement-Supplement.pdf]

1     **Supplementary Materials**

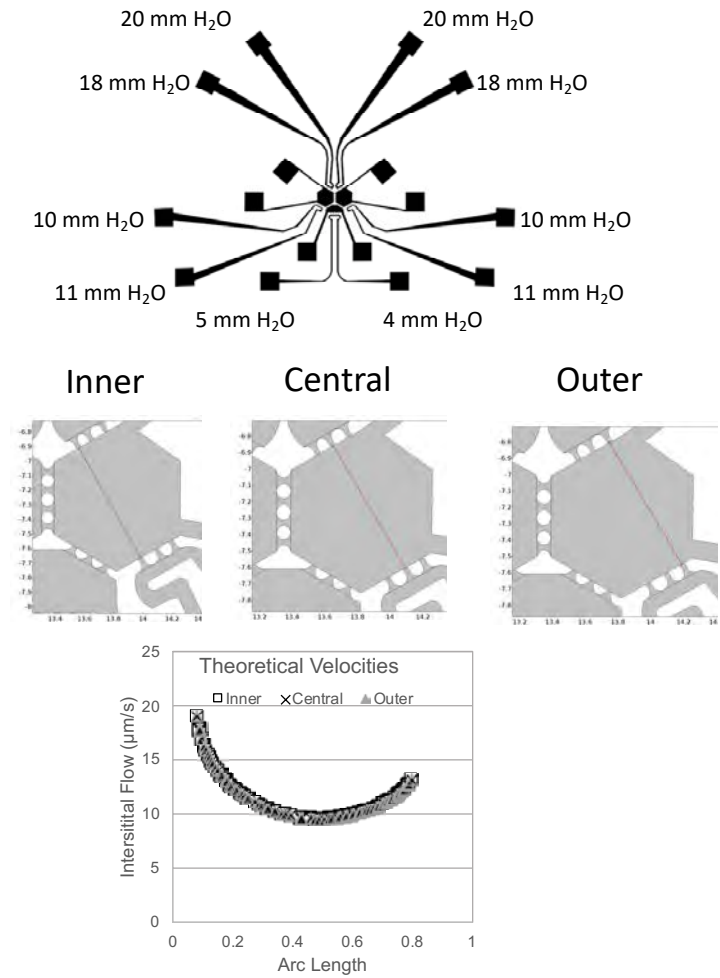

Supplemental Figure 1

2     **Figure S1. Theoretical modeling of interstitial flow in the device.** Schematic of the device, including the pressure  
3     used in each fluidic line to produce the desired interstitial flow. Three arbitrary lines drawn through the ports of the  
4     device. Theoretical modeling in COMSOL demonstrated similar interstitial velocity through all three ports when the  
5     device is filled with fibrin gel.  
6

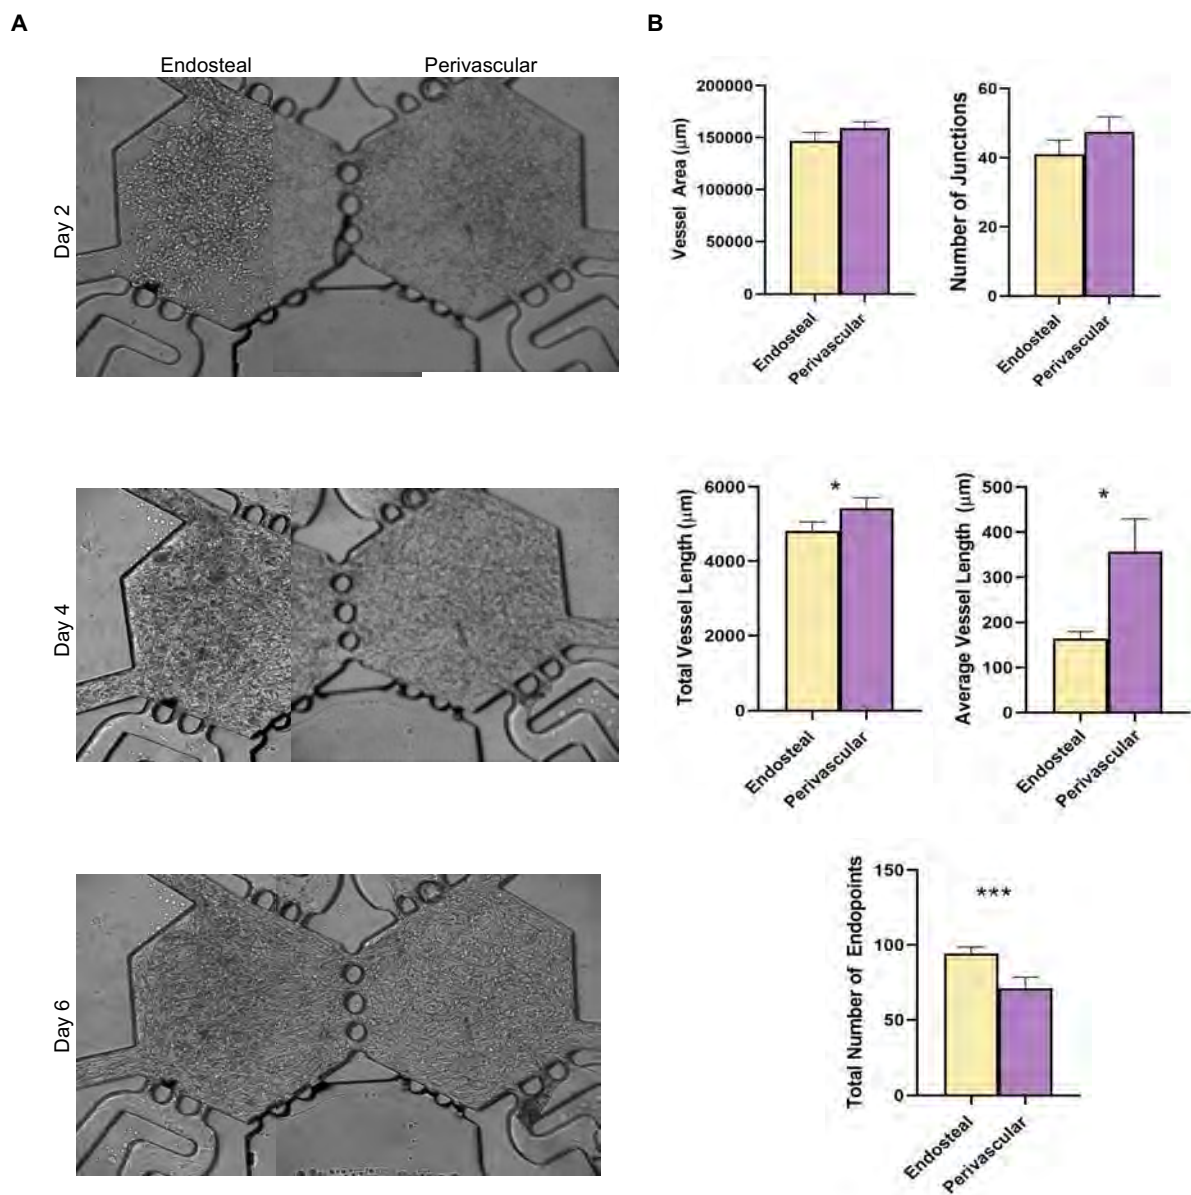

Supplemental Figure 2

**Figure S2. Characterization of vessel networks in the endosteal and perivascular niches of the BMoC.** (A) Microvascular networks self-assembled from a cell suspension (Day 2) into vascular fragments (Day 4) and an interconnected network (Day 6). (B) Vascular networks stained for either CD34 or CD31 in Fig. 2 and Fig. 3 were characterized using Angiotool. Mean with SEM shown for total vessel area (top), total vessel length (middle), and total number of endpoints (bottom); n=10. \*p<0.05, \*\*p<0.01, paired t-test.

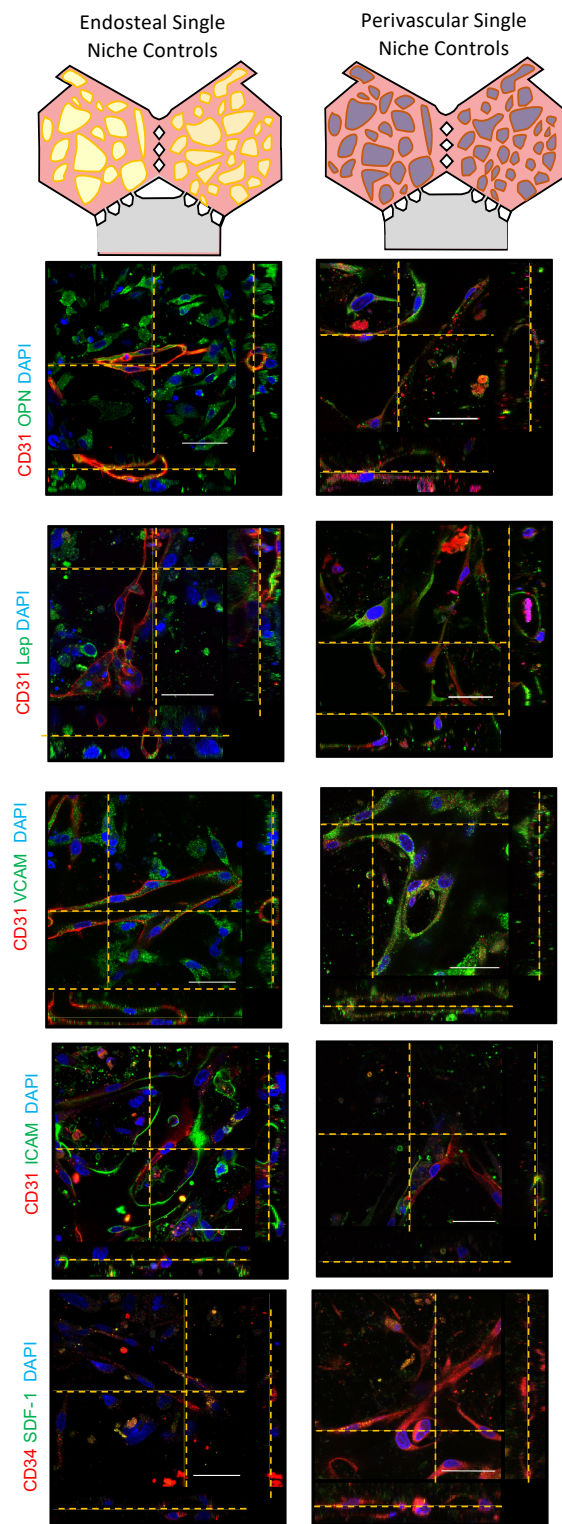

Supplemental Figure 3

**Figure S3. Single niche controls expressed markers associated with *in vivo* bone marrow.** Endothelial cells (CD34 or CD31, red) and osteopontin, leptin, VCAM-1, ICAM-1, and SDF-1 (all green). Nuclei were counterstained with DAPI (blue). Scale bar: 50  $\mu$ m. Expression of SDF-1/CXCL-12 was muted in the single niche perivascular control compared to the BMoAC.

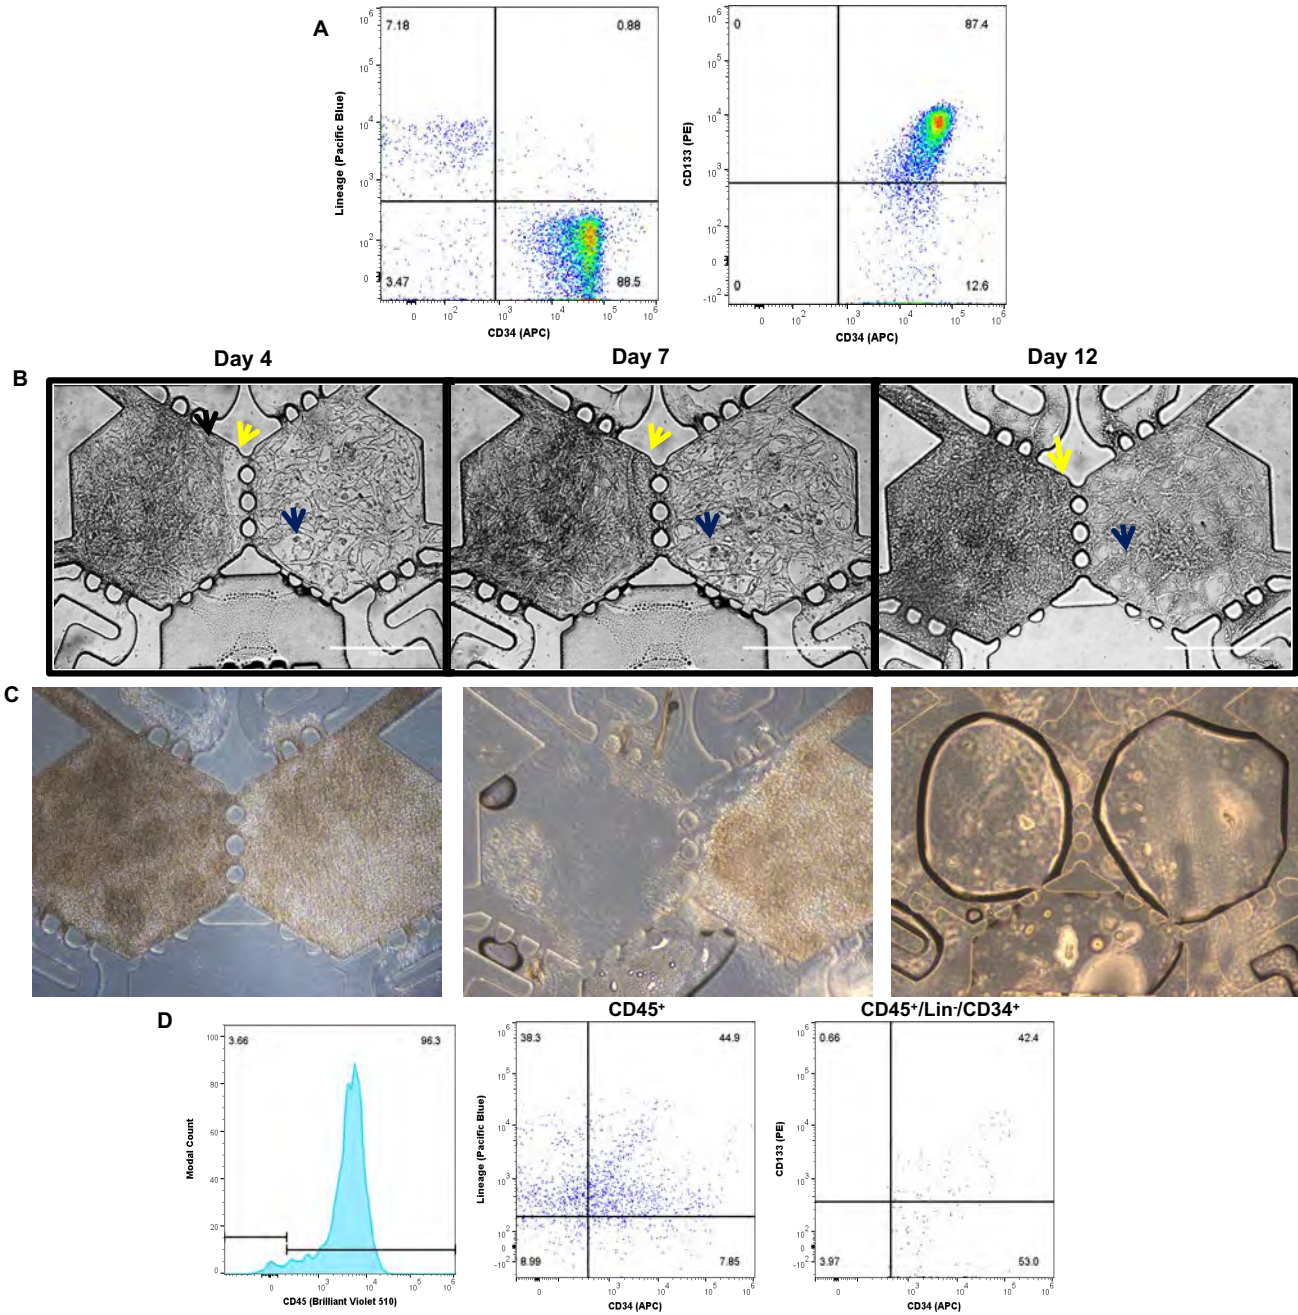

Supplemental Figure 4

**Figure S4. Characterization of HSPC prior to loading in, during culture in, and following recovery from the BMoAC.** (A) Representative flow cytometry plot of Lin<sup>-</sup>/CD34<sup>+</sup> and CD133<sup>+</sup>/CD34<sup>+</sup> cells isolated from cord blood. These cells were later cultured in the BMoAC as HSPC. (B) CD34<sup>+</sup> cells proliferated in the device during the 14 day culture period. Yellow and dark blue arrows highlight CD34-derived cells in the endosteal and perivascular niches, respectively. Scale bar: 500  $\mu$ m. (C) Representative images of a device digested with 10 U/mL nattokinase. Cells from each niche were isolated separately for downstream analysis. (D) Representative flow cytometry plot of cells collected from the perivascular niche following digestion of the device on Day 10.

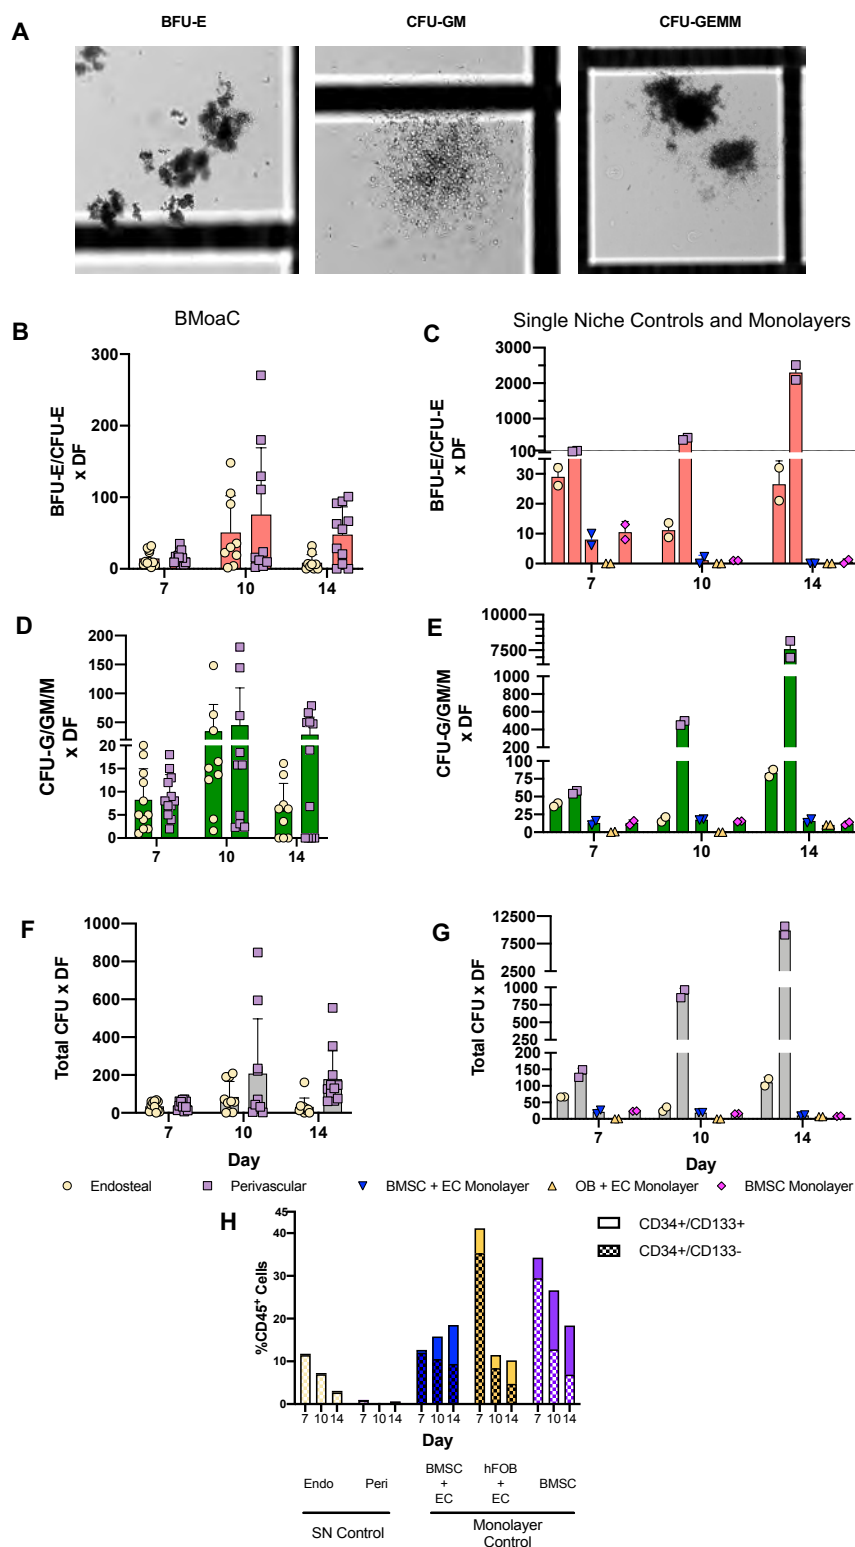

Supplemental Figure 5

27

28 **Figure S5. Functional characterization and quantification of HSPC isolated from BMoaC, SN controls, and**  
 29 **monolayer controls. (A)** Representative images of CFU colonies generated by cells collected from BMoaC devices  
 30 following 14 days of culture. Colonies were quantified according to their morphology. **(B, D, F)** BMoaC, **(C, E, G)**  
 31 SN, and monolayer controls showed different CFU potential for **(B, C)** erythroid and **(D, E)** myeloid lineages. There

32 were no significant differences between the endosteal and the perivascular niches of the BMoaC; both niches  
33 supported erythroid and myeloid CFU and had a similar number of total colonies, biological replicates with n=10-11.  
34 SN controls supported erythroid and myeloid CFU. Monolayer controls, including CD34<sup>+</sup> cells cultured on BMSC,  
35 had a limited ability to support cells with erythroid CFU potential past day 7 or to support cells with myeloid CFU  
36 potential. **(F, G)** The total number of CFU was much higher in the SN than the monolayer controls. **(H)** SN and  
37 monolayer controls differed in their ability to maintain a stem/progenitor cells (CD34<sup>+</sup>/CD133<sup>+</sup> and CD34<sup>+</sup>/CD133<sup>-</sup>)  
38 over time.

39

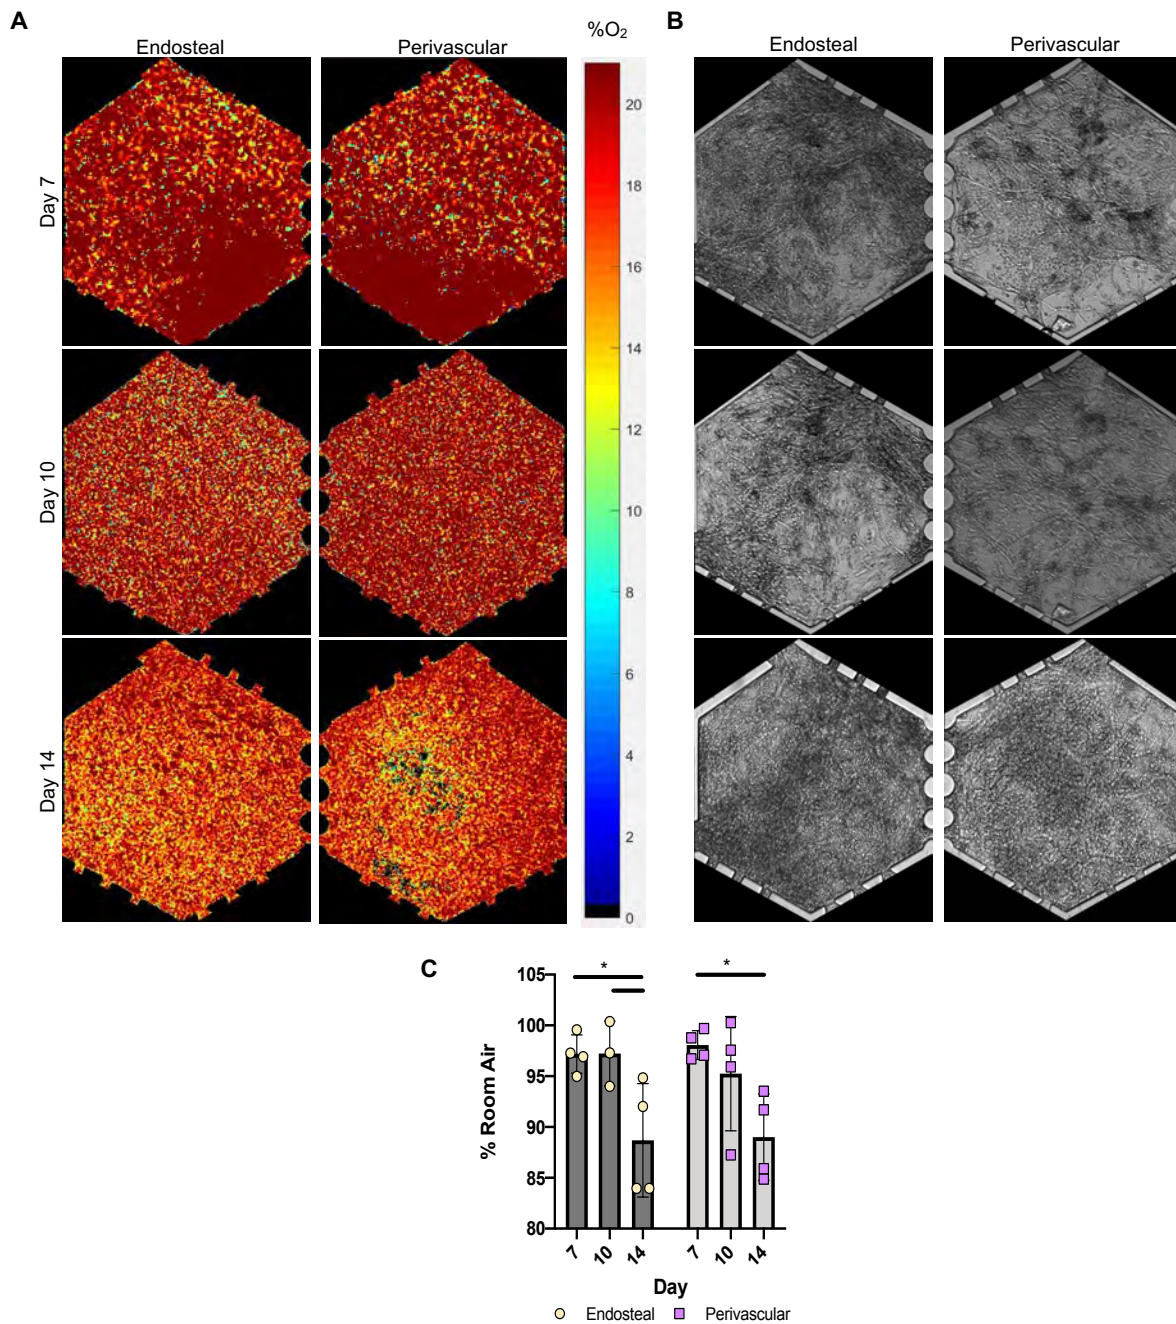

Supplemental Figure 6

**Figure 6. O<sub>2</sub> tension in the endosteal and perivascular niches of the BMoaC decreased over time.** (A) Maps of O<sub>2</sub> tension in the endosteal (left) and perivascular (right) chambers of a BMoaC device on days 7, 10, and 14. Measurements were collected using phosphorescence lifetime imaging microscopy (PhLIM) and the oxygen sensitive dye Oxyphor G4. (B) Brightfield images of the tissue chambers from panel A.

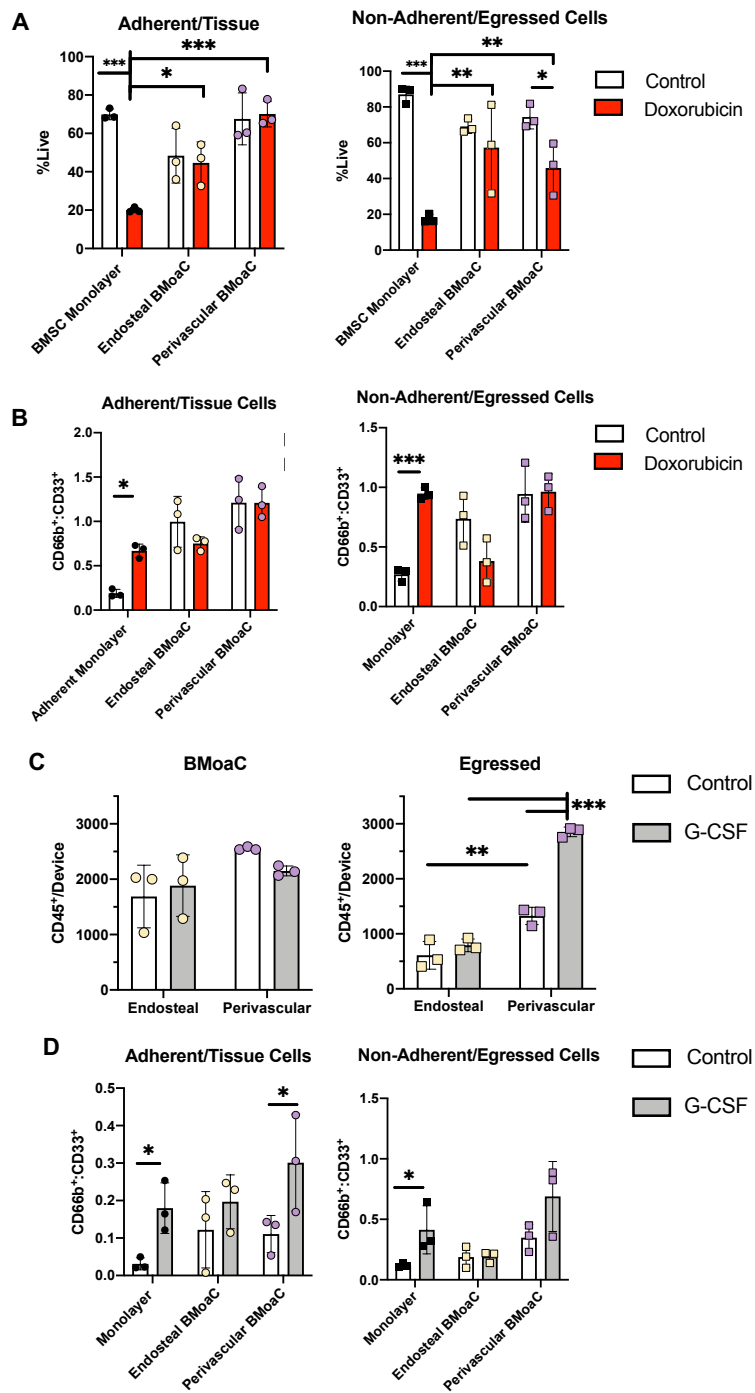

Supplemental Figure 7

**Figure S7. Treatment with doxorubicin or G-CSF altered cell populations in the BMoAC and monolayer controls.**

**(A)** Exposure to 0.5 M Doxorubicin for 48 hours significantly reduced the viability of both non-adherent and adherent cells in the monolayer control ( $***p < 0.0001$ , 2-way ANOVA with Sidak's post hoc comparison). In the BMoAC, cell viability was reduced only in egressed cells from the perivascular niche. **(B)** Doxorubicin significantly increased the ratio of CD66b<sup>+</sup>:CD33<sup>+</sup> cells for both adherent and non-adherent cells in the monolayer control ( $*p < 0.05$ ,  $***p < 0.0001$ , respectively 2-way ANOVA with Sidak's post hoc comparison), but did not affect the ratio

56 in the BMoaC. **(C)** Exposure to 30 ng/mL of G-CSF did not change the number of tissue resident cells in either niche  
57 of the BMoaC. In contrast, egressed cells from the perivascular niche increased significantly compared to control  
58 niches and treated endosteal niches (from the same devices; \*\* $p < 0.01$ , \*\*\* $p < 0.0001$ , 2-way ANOVA with Tukey's  
59 post hoc comparison test). **(D)** G-CSF significantly increased the ratio of CD66b<sup>+</sup>:CD33<sup>+</sup> cells for both adherent and  
60 non-adherent cells in the monolayer control. In the BMoaC, this ratio was significantly increased only in tissue  
61 resident cells from the perivascular niche (\* $p < 0.05$ , 2-way ANOVA with Sidak's post hoc comparison).

62  
63  
64

65  
66

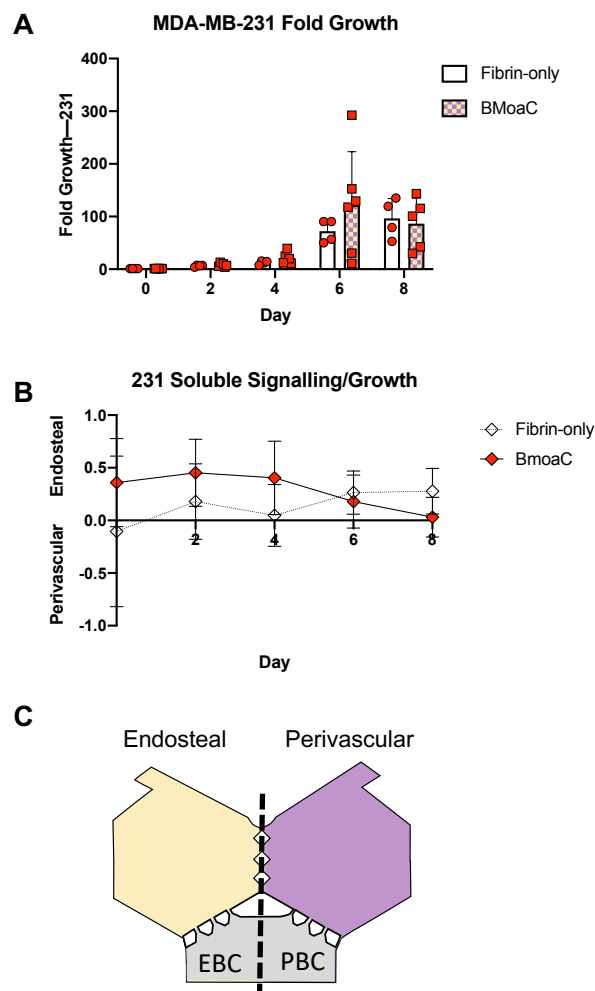

$$\text{Soluble Signaling/Growth} = \frac{EBC_{TX} - PBC_{TX}}{EBC_{TX} + PBC_{TX}}$$

Supplemental Figure 8

67  
68  
69  
70  
71  
72  
73  
74  
75  
76

**Figure S8. Characterization of MDA-MB-231 growth kinetics and response to soluble signaling in the BMoaC.**

**(A)** Cancer cell growth in the bottom chamber of fibrin-only and BMoaC devices was quantified over 9 days via a change in fluorescent area. **(B)** Growth on either side of the bottom chamber and overall growth were compared to assess the bias, if any, introduced by soluble signaling from the endosteal or perivascular niches. Positive and negative values indicated biased growth towards the endosteal and perivascular sides, respectively. There was no statistical difference from 0 over time. **(C)** A cartoon representation of the BMoaC device depicting the method used to analyze the effect of soluble signaling on growth. EBC: Endosteal half of the bottom chamber, PBC: Perivascular half of the bottom chamber, *TX*: Time X.

77

78

79

**Table S1. Immunofluorescent antibodies.** Antibodies were used at 1:100 unless otherwise noted.

| <i>Antigen</i>        | <i>Fluorophore/host</i> | <i>Vendor</i>     | <i>Cat #</i>   |
|-----------------------|-------------------------|-------------------|----------------|
| CD34                  | APC                     | BioLegend         | 343510         |
| Laminin               | Alexa Fluor 488         | Novus Biologicals | NB300-144AF488 |
| CD54                  | Alexa Fluor 488         | BioLegend         | 322713         |
| CD62E                 | APC                     | BD Biosciences    | 551144         |
| CXCL-12               | PE                      | R&D Systems       | IC350P         |
| Nestin                | Alexa Fluor 488         | ThermoFisher      | 53-9843-80     |
| CD90                  | FITC                    | BioLegend         | 328108         |
| CD14                  | Brilliant Violet 421    | BioLegend         | 325628         |
| Lineage               | Pacific Blue            | BioLegend         | 348805         |
| CD31 (JC/70A)         | Mouse                   | ThermoFisher      | MS-353-S       |
| VCAM-1                | Rabbit                  | Abcam             | ab134047       |
| Osteopontin*          | Rabbit                  | Abcam             | ab8448         |
| Leptin                | Rabbit                  | ThermoFisher      | PA1-052        |
| Goat anti-Rabbit IgG* | Alexa Fluor 488         | Invitrogen        | A-11008        |
| Goat anti-Mouse IgG*  | Alexa Fluor 555         | Invitrogen        | A-21422        |
| SytoxOrange           | N/A                     | ThermoFisher      | S11368         |
| DAPI                  | N/A                     | ThermoFisher      | D1306          |

\*Used at 1:1000

80

81

82

83

**Table S2. Flow cytometry antibodies.** Antibodies were used in a final volume of 100 µL.

| <i>Antigen</i> | <i>Fluorophore</i>   | <i>Vendor</i> | <i>Cat #</i> | <i>Vol. per test</i> |
|----------------|----------------------|---------------|--------------|----------------------|
| CD14           | Alexa Fluor 700      | BioLegend     | 325614       | 5 µL                 |
| CD15           | APC/Cy7              | BioLegend     | 323048       | 5 µL                 |
| CD33           | Brilliant Violet 510 | BioLegend     | 366610       | 5 µL                 |
| CD34           | APC                  | BioLegend     | 343510       | 5 µL                 |
| CD45           | FITC                 | BioLegend     | 368508       | 5 µL                 |
| CD133          | PE                   | BioLegend     | 372804       | 5 µL                 |
| Lineage        | Pacific Blue         | BioLegend     | 348805       | 20 µL                |
| Live/Dead      | Fixable Yellow       | ThermoFisher  | L34959       | 1 µL                 |

84

85

86  
87  
88  
89  
90  
91  
92  
93  
94  
95  
96  
97  
98

**Movie S1. Microvascular networks in the BMoaC were perfused with 70 kDa TRITC-dextran.**

**Movie S2. CD34<sup>+</sup>-derived cells migrated through the device, into the fluidic lines, and to the adjacent chamber.**  
10-hour timelapse video of a BMoaC on Day 6 of culture. Images were acquired every twenty minutes.

**Movie S3. Confocal Z-stack of the BMoaC endosteal niche.** In the region shown in Fig. 3Ci, a blood vessel surrounds a colony of CD34<sup>+</sup> (red) and Lin<sup>+</sup> (green) cells in the endosteal niche.

**Movie S4. Confocal Z-stack of the BMoaC perivascular niche.** In the region shown in Fig. 3Cii, CD34<sup>+</sup> (red) and Lin<sup>+</sup> (green) are seen coming in and out of focus. A blood vessel is located on the left side of the images.
